# Supplementary material for: The Potential Role of DNA Methylation in Abdominal Aortic Aneurysms
Source: PubMed Central journal article supplement (PMC4463699; doi:10.3390/ijms160511259), 2015-05-18
Supplement: ijms-16-11259-s001.pdf [file ijms-16-11259-s001.pdf]

## Supplementary Information

**Table S1.** Donor and sample information for blood samples used in the microarray and gene expression studies.

| Sample ID | Age (Years) | Diagnosis | Smoking | Classification | DNA Methylation | Gene Expression | RIN  |
|-----------|-------------|-----------|---------|----------------|-----------------|-----------------|------|
| ER001     | 68          | AAA       | No      | AAA            | √               | -               | 8.60 |
| ER002     | 68          | AAA       | Yes     | AAA            | √               | √               | -    |
| ER004     | 56          | AAA       | Yes     | AAA            | √               | -               | 4.90 |
| ER005     | 85          | AAA       | No      | AAA            | √               | √               | -    |
| ER006     | 68          | AAA       | Yes     | AAA            | √               | √               | 5.80 |
| ER007     | 72          | AAA       | Yes     | AAA            | √               | √               | -    |
| ER008     | 60          | AAA       | Yes     | AAA            | √               | √               | 6.50 |
| ER009     | 66          | AAA       | Yes     | AAA            | √               | √               | 7.30 |
| ER010     | 61          | VV        | No      | Control        | √               | -               | 9.40 |
| ER012     | 72          | VV        | No      | Control        | √               | √               | 8.90 |
| ER013     | 43          | VV        | Yes     | Control        | √               | √               | 8.60 |
| ER015     | 75          | VI        | No      | Control        | √               | -               | 7.00 |
| ER016     | 65          | VV        | Yes     | Control        | √               | -               | 7.60 |
| ER017     | 47          | VV        | No      | Control        | √               | √               | -    |
| ER021     | 86          | AAA       | No      | AAA            | √               | √               | -    |
| ER023     | 85          | AAA       | No      | AAA            | √               | √               | -    |
| ER024     | 48          | VV        | No      | Control        | √               | √               | 8.80 |
| ER025     | 74          | ESRD      | No      | Control        | √               | √               | 6.30 |
| ER026     | 82          | AAA       | No      | AAA            | √               | -               | 4.90 |
| ER028     | 67          | VTE       | Yes     | Control        | √               | √               | 3.20 |
| ER029     | 58          | Unknown   | Yes     | Control        | √               | √               | 9.10 |
| ER030     | 50          | DVT       | Yes     | Control        | √               | √               | 8.40 |
| ER031     | 46          | DVT       | Yes     | Control        | √               | -               | 8.50 |
| ER032     | 60          | VV        | Yes     | Control        | √               | √               | 8.50 |
| ER033     | 62          | VV        | No      | Control        | √               | √               | 8.50 |
| ER034     | 69          | AAA       | Yes     | AAA            | √               | √               | 8.50 |
| ER035     | 56          | Unknown   | Yes     | Control        | √               | √               | 8.70 |
| ER036     | 68          | AAA       | Yes     | AAA            | √               | √               | 8.50 |
| ER038     | 71          | AAA       | Yes     | AAA            | √               | √               | 8.00 |
| ER039     | 61          | CD        | Yes     | Control        | √               | √               | 9.10 |
| ER040     | 67          | AAA       | Yes     | AAA            | √               | √               | 8.60 |
| ER041     | 80          | CD        | No      | Control        | √               | √               | 9.30 |
| ER042     | 77          | AVM       | No      | Control        | √               | -               | 8.90 |
| ER045     | 70          | CD        | No      | Control        | √               | √               | 9.00 |
| ER046     | 51          | ESRD      | Yes     | Control        | √               | √               | 8.50 |
| ER048     | 71          | AAA       | No      | AAA            | -               | √               | 8.20 |
| ER049     | 59          | VV        | Yes     | Control        | -               | √               | 9.20 |
| ER050     | 71          | CD        | No      | Control        | √               | √               | 8.20 |
| ER051     | 76          | AAA       | No      | AAA            | √               | √               | 5.40 |
| ER052     | 76          | AAA       | No      | AAA            | √               | √               | 8.30 |
| ER053     | 59          | AAA       | Yes     | AAA            | √               | √               | 8.80 |
| ER054     | 58          | AAA       | No      | AAA            | √               | -               | 8.60 |

Table S1. *Cont.*

| Sample ID | Age (Years) | Diagnosis | Smoking | Classification | DNA Methylation | Gene Expression | RIN  |
|-----------|-------------|-----------|---------|----------------|-----------------|-----------------|------|
| ER056     | 80          | AAA       | No      | AAA            | √               | -               | 8.20 |
| ER057     | 69          | AAA       | No      | AAA            | -               | √               | -    |
| ER066     | 69          | AAA       | Yes     | AAA            | -               | √               | -    |
| ER067     | 88          | CD        | No      | Control        | -               | √               | -    |
| ER068     | 61          | CABG      | No      | Control        | -               | √               | -    |
| ER072     | 74          | AAA       | No      | AAA            | -               | √               | -    |
| ER073     | 75          | CD        | Yes     | Control        | -               | √               | -    |
| ER074     | 86          | AAA       | No      | AAA            | -               | √               | -    |
| ER075     | 72          | AAA       | Yes     | AAA            | -               | √               | -    |
| ER076     | 81          | AAA       | No      | AAA            | -               | √               | -    |
| ER077     | 78          | AAA       | No      | AAA            | -               | √               | -    |
| ER078     | 67          | AAA       | Yes     | AAA            | -               | √               | -    |
| ER079     | 78          | AAA       | Yes     | AAA            | -               | √               | -    |
| ER080     | 73          | AAA       | No      | AAA            | -               | √               | -    |

AAA, abdominal aortic aneurysm; AVM, arteriovenous malformation; CABG, coronary artery bypass graft; CD, carotid disease; DVT, deep vein thrombosis; ESRD, end stage renal disease; RIN, RNA Integrity Number obtained from Agilent BioAnalyzer; VI, venous insufficiency; VTE, venous thromboembolism; VV, varicose veins. All controls were without aneurysmal disease at the time of recruitment. See Table 1 for summary of sample groups used for the analyses. This table only includes samples that passed quality control filters and were used in the final analysis for both the DNA methylation and gene expression studies.

**Table S2.** Annotation for individual CpGs contained in the CpGIs that contributed to the principal components.

| CpGI Identifier           | CpG Name   | Gene Symbol(s)         | Gene Context of CpG | CpGI Context | Chromosome | Nucleotide Position |
|---------------------------|------------|------------------------|---------------------|--------------|------------|---------------------|
| chr4: 190962111–190962689 | cg22288613 | NA                     | NA                  | Island       | chr4       | 190962249           |
|                           | cg25886683 | NA                     | NA                  | S_Shore      | chr4       | 190962794           |
|                           | cg27154432 | NA                     | NA                  | S_Shelf      | chr4       | 190966117           |
| chr6: 2891929–2892182     | cg19577958 | <i>SERPINB9</i>        | 3'-UTR              | N_Shelf      | chr6       | 2888212             |
|                           | cg05175540 | <i>SERPINB9</i>        | Body                | N_Shore      | chr6       | 2890674             |
|                           | cg09046168 | <i>SERPINB9</i>        | Body                | Island       | chr6       | 2891973             |
|                           | cg22376758 | <i>SERPINB9</i>        | Body                | Island       | chr6       | 2892050             |
|                           | cg20726195 | <i>SERPINB9</i>        | Body                | Island       | chr6       | 2892148             |
|                           | cg10863922 | <i>SERPINB9</i>        | Body                | Island       | chr6       | 2892150             |
|                           | cg01345354 | <i>SERPINB9</i>        | Body                | Island       | chr6       | 2892152             |
|                           | cg11296767 | <i>SERPINB9</i>        | Body                | S_Shore      | chr6       | 2894011             |
| chr6: 41068475–41069343   | cg15838413 | <i>SERPINB9</i>        | Body                | S_Shelf      | chr6       | 2894553             |
|                           | cg03942922 | <i>NFYA</i>            | Body                | N_Shelf      | chr6       | 41064480            |
|                           | cg04082020 | <i>NFYA; LOC221442</i> | 3'-UTR; TSS1500     | N_Shore      | chr6       | 41068009            |
|                           | cg02728342 | <i>NFYA; LOC221442</i> | 3'-UTR; TSS1500     | N_Shore      | chr6       | 41068173            |
|                           | cg02167203 | <i>NFYA; LOC221442</i> | 3'-UTR; TSS1500     | Island       | chr6       | 41068553            |
|                           | cg25110423 | <i>NFYA; LOC221442</i> | 3'-UTR; TSS200      | Island       | chr6       | 41068646            |
|                           | cg04346459 | <i>NFYA; LOC221442</i> | 3'-UTR; TSS200      | Island       | chr6       | 41068666            |
|                           | cg20398880 | <i>NFYA; LOC221442</i> | 3'-UTR; TSS200      | Island       | chr6       | 41068722            |
|                           | cg09580153 | <i>NFYA; LOC221442</i> | 3'-UTR; TSS200      | Island       | chr6       | 41068724            |
|                           | cg06671660 | <i>NFYA; LOC221442</i> | 3'-UTR; TSS200      | Island       | chr6       | 41068741            |
|                           | cg03644281 | <i>NFYA; LOC221442</i> | 3'-UTR; TSS200      | Island       | chr6       | 41068752            |
|                           | cg00322698 | <i>NFYA; LOC221442</i> | 3'-UTR; Body        | Island       | chr6       | 41069048            |
|                           | cg19085918 | <i>NFYA; LOC221442</i> | 3'-UTR; Body        | Island       | chr6       | 41069119            |
|                           | cg07403317 | <i>LOC221442</i>       | Body                | S_Shore      | chr6       | 41070479            |
|                           | cg02575768 | <i>LOC221442</i>       | Body                | S_Shelf      | chr6       | 41073142            |

Table S2. Cont.

| CpGI Identifier           | CpG Name             | Gene Symbol(s) | Gene Context of CpG | CpGI Context | Chromosome | Nucleotide Position |        |
|---------------------------|----------------------|----------------|---------------------|--------------|------------|---------------------|--------|
| chr6: 168435835–168436086 | cg23823000           | <i>KIF25</i>   | Body                | N_Shelf      | chr6       | 168433191           |        |
|                           | cg21477075           | <i>KIF25</i>   | Body                | N_Shelf      | chr6       | 168433436           |        |
|                           | cg01134139           | <i>KIF25</i>   | Body                | N_Shore      | chr6       | 168435636           |        |
|                           | cg24246628           | <i>KIF25</i>   | Body                | Island       | chr6       | 168435914           |        |
|                           | cg08476511           | <i>KIF25</i>   | Body                | Island       | chr6       | 168435923           |        |
|                           | cg12003941           | <i>KIF25</i>   | Body                | Island       | chr6       | 168436019           |        |
|                           | cg18319852           | <i>KIF25</i>   | Body                | S_Shore      | chr6       | 168436099           |        |
|                           | cg14316629           | <i>KIF25</i>   | Body                | S_Shore      | chr6       | 168436353           |        |
|                           | cg04775383           | <i>KIF25</i>   | Body                | S_Shelf      | chr6       | 168439228           |        |
| chr9: 124987743–124991086 | cg02825412           | <i>LHX6</i>    | Body                | N_Shore      | chr9       | 124985756           |        |
|                           | cg09723488           | <i>LHX6</i>    | Body                | Island       | chr9       | 124987896           |        |
|                           | cg04282082           | <i>LHX6</i>    | Body                | Island       | chr9       | 124988720           |        |
|                           | cg21213617           | <i>LHX6</i>    | Body                | Island       | chr9       | 124989241           |        |
|                           | cg21469772           | <i>LHX6</i>    | Body                | Island       | chr9       | 124989294           |        |
|                           | cg13571460           | <i>LHX6</i>    | Body                | Island       | chr9       | 124989337           |        |
|                           | cg13862711           | <i>LHX6</i>    | Body                | Island       | chr9       | 124989915           |        |
|                           | cg03363289           | <i>LHX6</i>    | Body                | Island       | chr9       | 124990165           |        |
|                           | cg00142257           | <i>LHX6</i>    | Body                | Island       | chr9       | 124990276           |        |
|                           | cg13817952           | <i>LHX6</i>    | Body                | Island       | chr9       | 124990456           |        |
|                           | cg06866657           | <i>LHX6</i>    | Body                | Island       | chr9       | 124990754           |        |
|                           | cg21237939           | <i>LHX6</i>    | TSS200              | Island       | chr9       | 124991047           |        |
|                           | cg13648318           | <i>LHX6</i>    | TSS1500             | S_Shore      | chr9       | 124991408           |        |
|                           | cg22254104           | <i>LHX6</i>    | TSS1500             | S_Shore      | chr9       | 124991432           |        |
|                           | chr11: 396685–397462 | cg17840408     | <i>PKP3</i>         | Body         | Island     | chr11               | 396686 |
|                           |                      | cg25258098     | <i>PKP3</i>         | Body         | Island     | chr11               | 396794 |
| cg01794156                |                      | <i>PKP3</i>    | Body                | Island       | chr11      | 397077              |        |

Table S2. Cont.

| CpGI Identifier          | CpG Name                 | Gene Symbol(s) | Gene Context of CpG | CpGI Context | Chromosome | Nucleotide Position |
|--------------------------|--------------------------|----------------|---------------------|--------------|------------|---------------------|
| chr11: 75139454–75139817 | cg06329735               | <i>KLHL35</i>  | Body                | N_Shore      | chr11      | 75139390            |
|                          | cg05353869               | <i>KLHL35</i>  | Body                | Island       | chr11      | 75139544            |
|                          | cg04231094               | <i>KLHL35</i>  | Body                | Island       | chr11      | 75139680            |
|                          | cg10909185               | <i>KLHL35</i>  | Body                | Island       | chr11      | 75139736            |
| chr17: 152117–152438     | cg27565067               | <i>RPH3AL</i>  | Body                | N_Shelf      | chr17      | 149484              |
|                          | cg25416149               | <i>RPH3AL</i>  | Body                | N_Shelf      | chr17      | 149488              |
|                          | cg08900396               | <i>RPH3AL</i>  | Body                | N_Shelf      | chr17      | 149582              |
|                          | cg19040474               | <i>RPH3AL</i>  | Body                | N_Shore      | chr17      | 151914              |
|                          | cg04897931               | <i>RPH3AL</i>  | Body                | N_Shore      | chr17      | 152089              |
|                          | cg06755596               | <i>RPH3AL</i>  | Body                | Island       | chr17      | 152189              |
|                          | cg06571687               | <i>RPH3AL</i>  | Body                | Island       | chr17      | 152259              |
|                          | cg17316718               | <i>RPH3AL</i>  | Body                | Island       | chr17      | 152308              |
|                          | cg17193961               | <i>RPH3AL</i>  | Body                | Island       | chr17      | 152350              |
|                          | cg08770870               | <i>RPH3AL</i>  | Body                | S_Shore      | chr17      | 154410              |
|                          | cg11940040               | <i>RPH3AL</i>  | Body                | S_Shore      | chr17      | 154420              |
|                          | chr17: 19099818–19100138 | cg27028682     | NA                  | NA           | Island     | chr17               |
| cg10751605               |                          | NA             | NA                  | Island       | chr17      | 19100051            |
| chr19: 612989–614068     | cg06657917               | <i>HCN2</i>    | Body                | Island       | chr19      | 613111              |
|                          | cg00587228               | <i>HCN2</i>    | Body                | Island       | chr19      | 613433              |
|                          | cg17403731               | <i>HCN2</i>    | Body                | Island       | chr19      | 613505              |
|                          | cg12159023               | <i>HCN2</i>    | Body                | Island       | chr19      | 613818              |
| chr19: 1033605–1035236   | cg10658703               | <i>CNN2</i>    | Body                | N_Shore      | chr19      | 1033242             |
|                          | cg05220090               | <i>CNN2</i>    | Body                | Island       | chr19      | 1033606             |
|                          | cg10730425               | <i>CNN2</i>    | Body                | Island       | chr19      | 1035093             |
|                          | cg15975960               | <i>CNN2</i>    | Body                | S_Shore      | chr19      | 1035450             |

Table S2. Cont.

| CpGI Identifier          | CpG Name   | Gene Symbol(s)           | Gene Context of CpG   | CpGI Context | Chromosome | Nucleotide Position |
|--------------------------|------------|--------------------------|-----------------------|--------------|------------|---------------------|
| chr19: 37786692–37787110 | cg22148999 | NA                       | NA                    | N_Shore      | chr19      | 37784800            |
|                          | cg06862049 | <i>LMTK3</i>             | Body                  | Island       | chr19      | 49001890            |
|                          | cg18955367 | <i>LMTK3</i>             | Body                  | Island       | chr19      | 49002338            |
|                          | cg16194588 | <i>LMTK3</i>             | Body                  | Island       | chr19      | 49002477            |
|                          | cg26522157 | <i>LMTK3</i>             | Body                  | Island       | chr19      | 49003082            |
|                          | cg00861945 | <i>LMTK3</i>             | Body                  | S_Shelf      | chr19      | 49007025            |
| chr20: 32254811–32255989 | cg01652532 | <i>NECAB3; C20orf134</i> | Body; TSS1500         | N_Shore      | chr20      | 32253007            |
|                          | cg06723459 | <i>NECAB3; C20orf134</i> | Body; TSS1500         | N_Shore      | chr20      | 32253019            |
|                          | cg12710480 | <i>NECAB3; C20orf134</i> | Body; TSS200          | N_Shore      | chr20      | 32254216            |
|                          | cg00478435 | <i>NECAB3; C20orf134</i> | Body; 1st Exon        | N_Shore      | chr20      | 32254706            |
|                          | cg07470512 | <i>NECAB3; C20orf134</i> | Body; 1st Exon 5'-UTR | Island       | chr20      | 32255052            |
|                          | cg03904042 | <i>NECAB3; C20orf134</i> | Body; 1st Exon        | Island       | chr20      | 32255491            |
|                          | cg14921437 | <i>NECAB3; C20orf134</i> | Body; 1st Exon        | Island       | chr20      | 32255988            |
| chr21: 38630052–38630507 | cg13403462 | <i>NECAB3; C20orf134</i> | Body; 1st Exon 3'-UTR | S_Shore      | chr20      | 32256071            |
|                          | cg23737637 | <i>DSCR3</i>             | Body                  | N_Shelf      | chr21      | 38627731            |
|                          | cg01922450 | <i>DSCR3</i>             | Body                  | N_Shore      | chr21      | 38628950            |
|                          | cg05126444 | <i>DSCR3</i>             | Body                  | N_Shore      | chr21      | 38629859            |
|                          | cg11287055 | <i>DSCR3</i>             | Body                  | Island       | chr21      | 38630234            |
|                          | cg00628697 | <i>DSCR3</i>             | Body                  | Island       | chr21      | 38630342            |
|                          | cg18380783 | <i>DSCR3</i>             | Body                  | Island       | chr21      | 38630506            |
|                          | cg16704958 | <i>DSCR3</i>             | Body                  | S_Shore      | chr21      | 38630728            |
| chrX: 72298626–72299108  | cg22515737 | <i>DSCR3</i>             | Body                  | S_Shelf      | chr21      | 38632928            |
|                          | cg08871618 | <i>PABPC1L2A</i>         | 1st Exon 3'-UTR       | N_Shore      | chrX       | 72297591            |
|                          | cg03505772 | <i>PABPC1L2A</i>         | 1st Exon 5'-UTR       | S_Shore      | chrX       | 72299310            |

Annotations from IlluminaHumanMethylation450kanno.ilmn12.hg19 [48]. NA, not applicable, since the CpGI was not in any gene. UTR: Untranslated Regions.
